# Supplementary material for: Investigation of the Aquifer Protective Capacity and Groundwater Quality around Some Open Dumpsites in Sapele Delta State, Nigeria
Source: Hindawi journal article supplement (doi:10.1155/2018/3653021), 2018-11-21
Supplement: f1 [file 3653021.f1.doc]

**DATA FOR MANUSCRIPT TITLED** **"INVESTIGATION OF THE AQUIFER PROTECTIVE CAPACITY AND GROUNDWATER QUALITY AROUND SOME OPEN DUMPSITES IN SAPELE DELTA STATE, NIGERIA"**

**Site Description:** New Road Axis, Sapele;

**Observers** - Dr J.O Oseji; Dr. J. C. Egbai, Mr. C.E. Etebefia and Dr. E. C. Okolie

**Instrument:** ABEM SAS 1000 Terrameter; Electrode Array: Schlumberger

| Electrode  Separation | Potential  Electrode  separation | **VES1**  Long:  E5041.573’  Lat: N5051.613’  E: 13 m | **VES2**  Long:  E5041.55’  Lat: N5051.752’  E: 12 m | **VES3**  Long:  E5041.572’  Lat: N5051.624’  E: 9 m | **VES4**  Long:  E5040.865’  Lat: N5053.057’  E: 9 m | **VES5**  Long:  E5041.198’  Lat: N5052.937’  E: 8 m | **VES6**  Long:  E5040.865’  Lat: N5053.051’  E: 7 m | **VES7**  Long:  E5040.763’  Lat: N5040.761’  E: 10 m | **VES8**  Long:  E5040.865’  Lat: N5053.057’  E: 10 m | **VES9**  Long:  E5040.865’  Lat: N5053.051’  E: 10 m |
| --- | --- | --- | --- | --- | --- | --- | --- | --- | --- | --- |
| AB/2  M | MN/2  M | 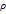  Ωm | 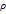  Ωm | 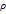  Ωm | 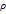  Ωm | 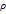  Ωm | 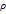  Ωm | 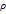  Ωm | 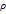  Ωm | 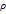  Ωm |
| 1 | 0.5 | 91.8 | 65.122 | 120.9 | 60.4 | 80.2 | 60.4 | 69.00 | 88.8 | 194.0 |
| 2 | 0.5 | 108.2 | 87.44 | 418.88 | 41.4 | 104.34 | 47.4 | 82.1 | 159.44 | 93.8 |
| 3 | 0.5 | 88.27 | 111.54 | 749.11 | 52.3 | 84.209 | 51.87 | 538 | 102.19 | 67.90 |
| 4 | 0.5 | 17.83 | 132.45 | 771.21 | 62.9 | 85.4 | 44.6 | 295.76 | 112.09 | 81.2 |
| 6 | 0.5 | 89.8 | 64.45 | 573.33 | 57.0 | 93.9 | 46.34 | 80.00 | 97.32 | 76.96 |
| 6 | 1 | 90.12 | 111.55 | 399.00 | 57.1 | 82.8 | 81.90 | 376.88 | 115.39 | 102.3 |
| 8 | 1 | 17.45 | 132.04 | 223.51 | 66.8 | 100.54 | 135.3 | 337.11 | 144 | 83.1 |
| 12 | 1 | 89.7 | 60.08 | 77.011 | 50.5 | 157.89 | 88.1 | 440.17 | 119.4 | 84.5 |
| 15 | 1 | 114.44 | 217.22 | 267.55 | 63.7 | 434.3 | 104.42 | 326 | 68.00 | 212.5 |
| 15 | 2 | 88.19 | 269.23 | 1306 | 133.76 | 280.16 | 231.54 | 440 | 88.09 | 69.88 |
| 20 | 2 | 327.4 | 265.33 | 2223 | 395.4 | 320.76 | 485.3 | 555.48 | 159.88 | 88.7 |
| 25 | 2 | 321.98 | 228.31 | 637.32 | 406.12 | 650.33 | 550 | 1228 | 198 | 111.90 |
| 32 | 2 | 90.4 | 246.11 | 2004 | 232.98 | 484.7 | 556 | 555 | 381 | 267.09 |
| 40 | 2 | 387.32 | 277.54 | 3306 | 1221.2 | 1150 | 1132 | 989 | 222.83 | 245.98 |
| 40 | 5 | 451.8 | 374.2 | 2362 | 1206 | 970.5 | 1723 | 1444 | 549.52 | 105.55 |
| 50 | 5 | 543 | 483.2 | 3532 | 899 | 181.08 | 1975 | 3266 | 526.6 | 304.3 |
| 65 | 5 | 149 | 440.10 | 2877 | 877 | 248.78 | 2180 | 908.58 | 473.3 | 186.09 |
| 100 | 5 | 364.22 | 417.88 | 1259 | 1221 | 764.32 | 3579 | 1862 | 228.55 | 141.21 |
| 100 | 10 | 291.31 | 301.11 | 1583 | 2139 | 920.11 | 3602 | 3185 | 877.07 | 204 |
| 150 | 10 | 146.32 | 242.43 | 1745.5 | 1706 | 884.22 | 2963 | 1882 | 382.57 | 355 |
| 200 | 10 | 103.7 | 355.12 | 858.32 | 1974 | 318.6 | 2323 | 908.11 | 882 | 943 |
| 200 | 20 | 88.9 | 1487 | 305.77 | 2577 | 452.09 | 2056 | 1756 | 1084 | 1070 |
| 250 | 20 | 172.13 | 1103 | 107.23 | 972 | 806.9 | 1794 | 376.12 | 473.32 | 681.5 |

**Field Data Acquired for the Head, Elevations and Depth to Water Level in Hand Dug Well.**

| S/n | Latitude | Longitude | Elevation  E (m) | Depth to water  level in hand dug well DWL (m) | Elevation of Hydraulic Head  H ═ E- DWL (m) |
| --- | --- | --- | --- | --- | --- |
| 1 | N05051.613’ | E005041.573’ | 13 | 5.80 | 7.20 |
| 2 | N05051.752’ | E005041.55’ | 12 | 5.32 | 6.68 |
| 3 | N05051.624’ | E005041.572’ | 9 | 5.20 | 3.80 |
| 4 | N05053.057’ | E005040.865’ | 9 | 6.20 | 2.80 |
| 5 | N05052.937’ | E005041.198’ | 8 | 5.10 | 2.90 |
| 6 | N05053.051’ | E005040.865’ | 7 | 5.80 | 1.20 |
| 7 | N05040.761’ | E005040.763’ | 10 | 5.40 | 4.60 |
| 8 | N05053.057 | E005040.865’ | 10 | 2.00 | 8.0 |
| 9 | N05053.051’ | E005040.865’ | 10 | 2.00 | 8.0 |

Concentration of Constituents in Groundwater in the Study Area.

| Borehole | pH | EC  μS/cm | Temperature (0C)  mg/L | TDS  mg/L | NH4+  mg/L | Al3+  mg/L | Zn2+  mg/L | Ni2+  mg/L | Fe2+  mg/L | Pb2+  mg/L) | Cd2+  mg/L |
| --- | --- | --- | --- | --- | --- | --- | --- | --- | --- | --- | --- |
| BH1 | 6.81 | 88.42 | 28.50 | 82.22 | 0.08 | 00.7 | 0.60 | 0.45 | 0.76 | 0.79 | 0.16 |
| 6.50 | 86.21 | 28.42 | 82.45 | 0.06 | 00.7 | 0.70 | 0.43 | 0.76 | 0.78 | 0.17 |
| BH2 | 6.60 | 98.54 | 28.80 | 99.12 | 0.04 | 00.8 | 0.40 | 0.35 | 0.71 | 0.76 | 0.19 |
| 6.73 | 95.26 | 28.81 | 96.62 | 0.05 | 00.6 | 0.40 | 0.37 | 0.73 | 0.79 | 0.17 |
| BH3 | 6.57 | 94.12 | 28.16 | 87.16 | 0.08 | 00.6 | 0.40 | 0.48 | 0.67 | 0.73 | 0.16 |
| 6.81 | 96.45 | 28.23 | 88.62 | 0.07 | 00.7 | 0.50 | 0.45 | 0.65 | 0.74 | 0.16 |
| BH4 | 6.57 | 82.67 | 28.45 | 92.24 | 0.05 | 00.5 | 0.60 | 0.52 | 0.75 | 0.69 | 0.14 |
| 6.21 | 87.11 | 28.34 | 95.25 | 0.04 | 00.6 | 0.50 | 0.50 | 0.75 | 0.65 | 0.15 |
| BH5 | 6.55 | 91.22 | 28.12 | 82.14 | 0.05 | 00.4 | 0.80 | 0.22 | 0.36 | 0.47 | 0.07 |
| 6.41 | 89.24 | 28.13 | 79.12 | 0.05 | 00.5 | 0.80 | 0.24 | 0.35 | 0.45 | 0.06 |
| BH6 | 6.71 | 93.24 | 28.56 | 80.12 | 0.06 | 00.7 | 0.80 | 0.23 | 0.39 | 0.46 | 0.08 |
| 6.42 | 94.12 | 28.67 | 79.12 | 0.06 | 00.8 | 0.70 | 0.22 | 0.35 | 0.46 | 0.07 |
| Min | 6.21 | 82.67 | 28.13 | 79.12 | 0.04 | 00.4 | 0.40 | 0.22 | 0.35 | 0.45 | 0.06 |
| Max | 6.81 | 98.54 | 28.81 | 99.12 | 0.08 | 00.8 | 0.80 | 0.52 | 0.76 | 0.79 | 0.19 |
| Range | 0.6 | 15.87 | 0.68 | 20 | 0.04 | 00.4 | 0.40 | 0.30 | 0.41 | 0.34 | 0.13 |
| Mean | 6.57 | 91.38 | 28.43 | 87.01 | 0.06 | 00.6 | 0.60 | 0.37 | 0.60 | 0.65 | 0.13 |
| SON  Permitted limit  (2007) | 6.5-8.5 | 1000 | 25 | 500 | *0.5 | 0.2 | 3 | 0.02 | 0.3 | 0.01 | 0.003 |

*Since NH4 from drinking water is not of immediate health relevance there is no guideline value (WHO 2011) However, the EU parametric value is 0.5 mg/L (EU 2011)


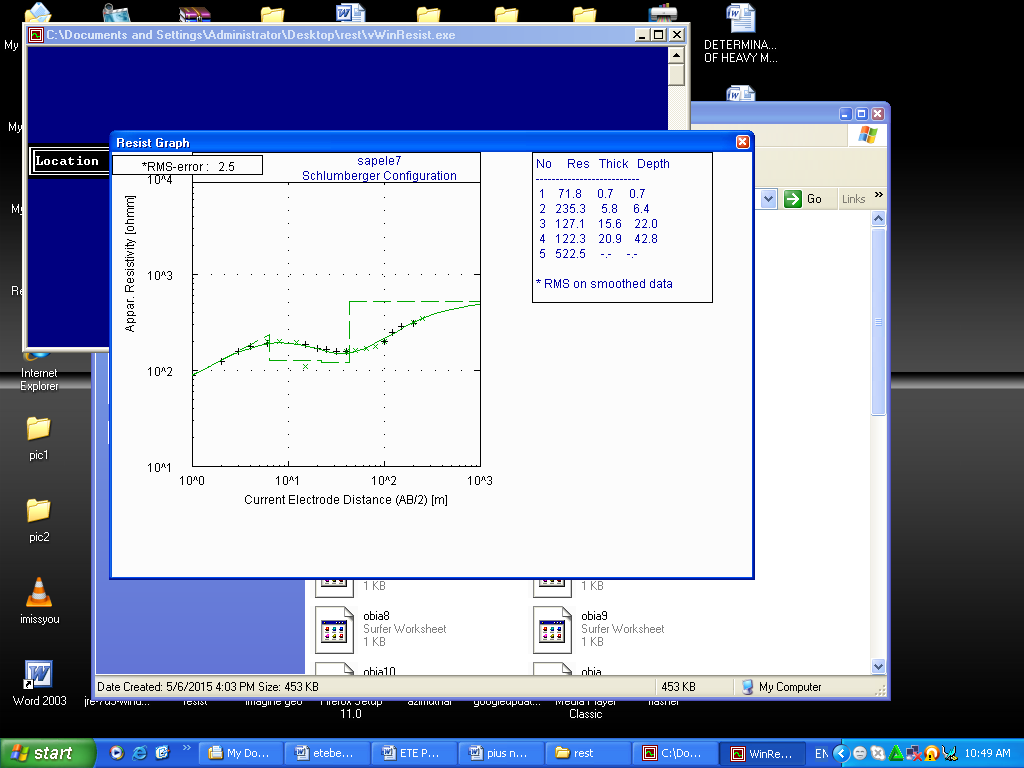


**Fig 18: Typical Hydrogeophysical Sounding Curve for Sapele VES 7.**


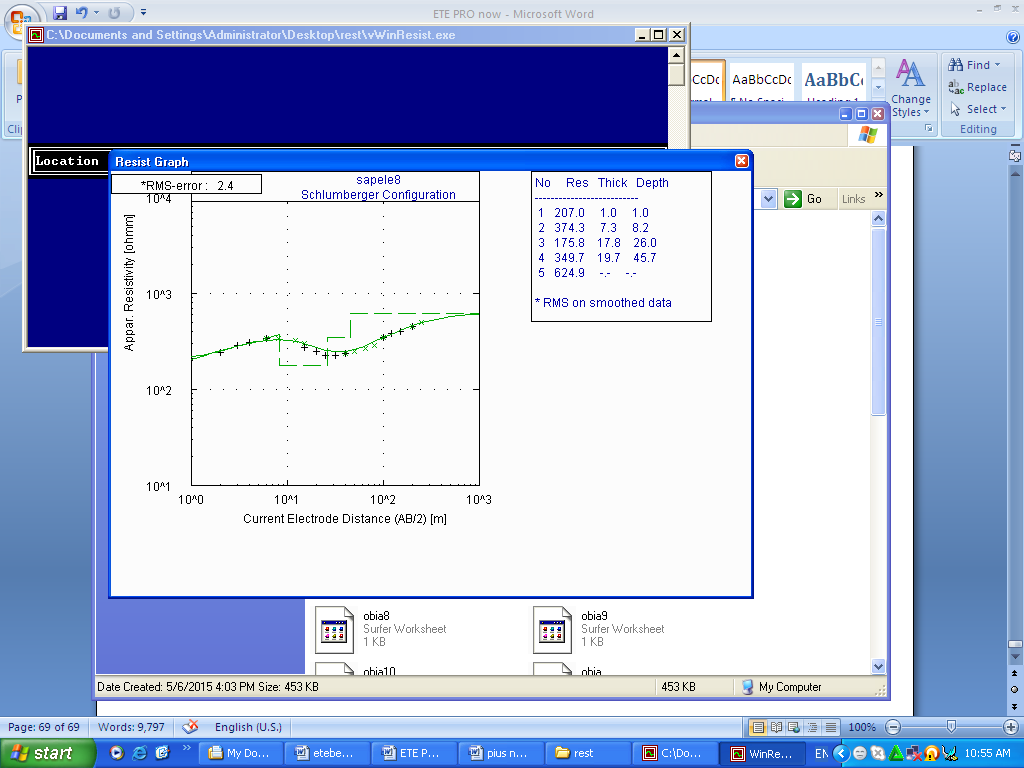


**Fig 19: Typical Hydrogeophysical Sounding Curve for Sapele VES 8.**


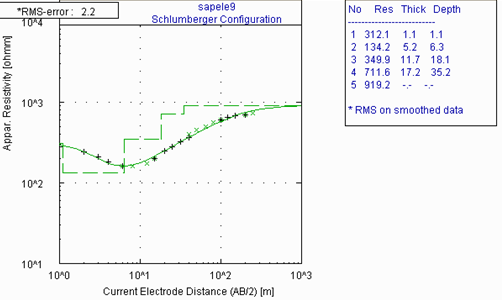


**Fig 20: Typical Hydrogeophysical Sounding Curve for Sapele VES 9.**

**
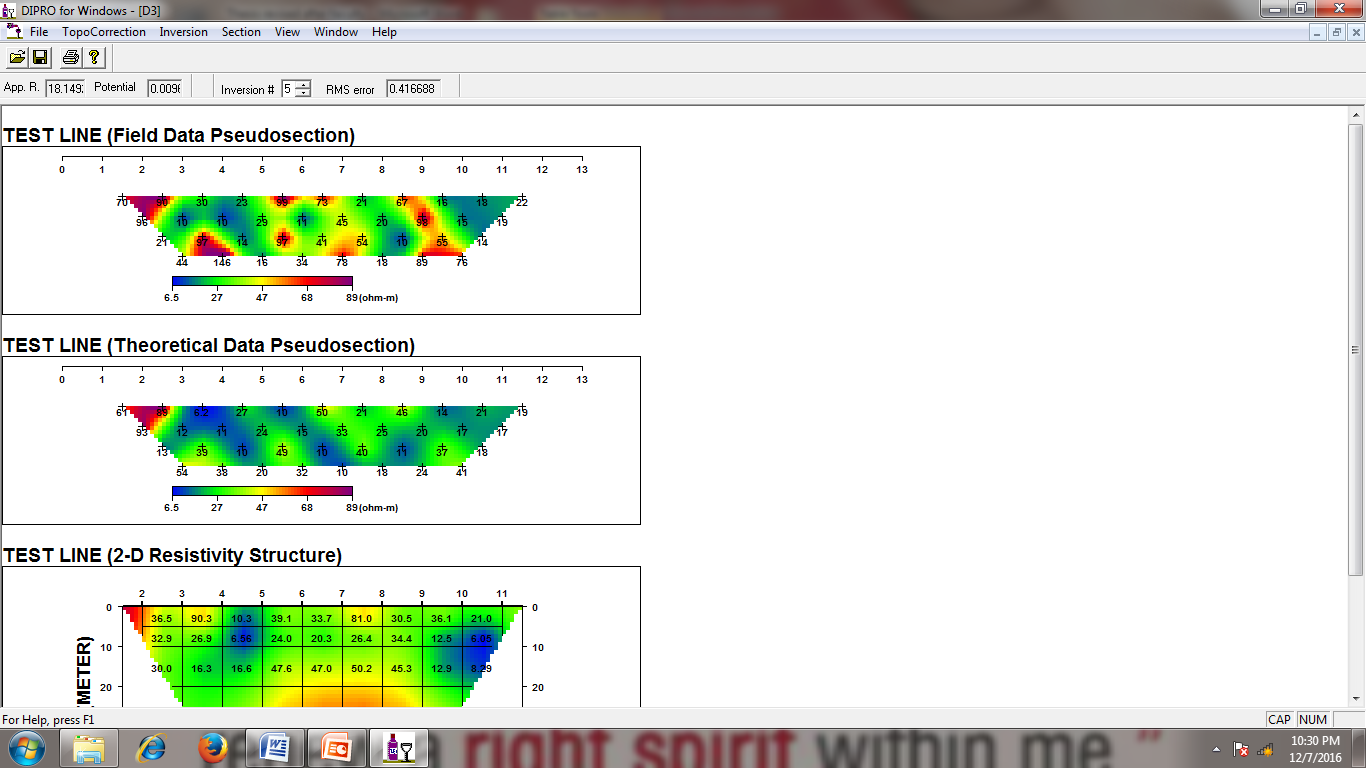
**


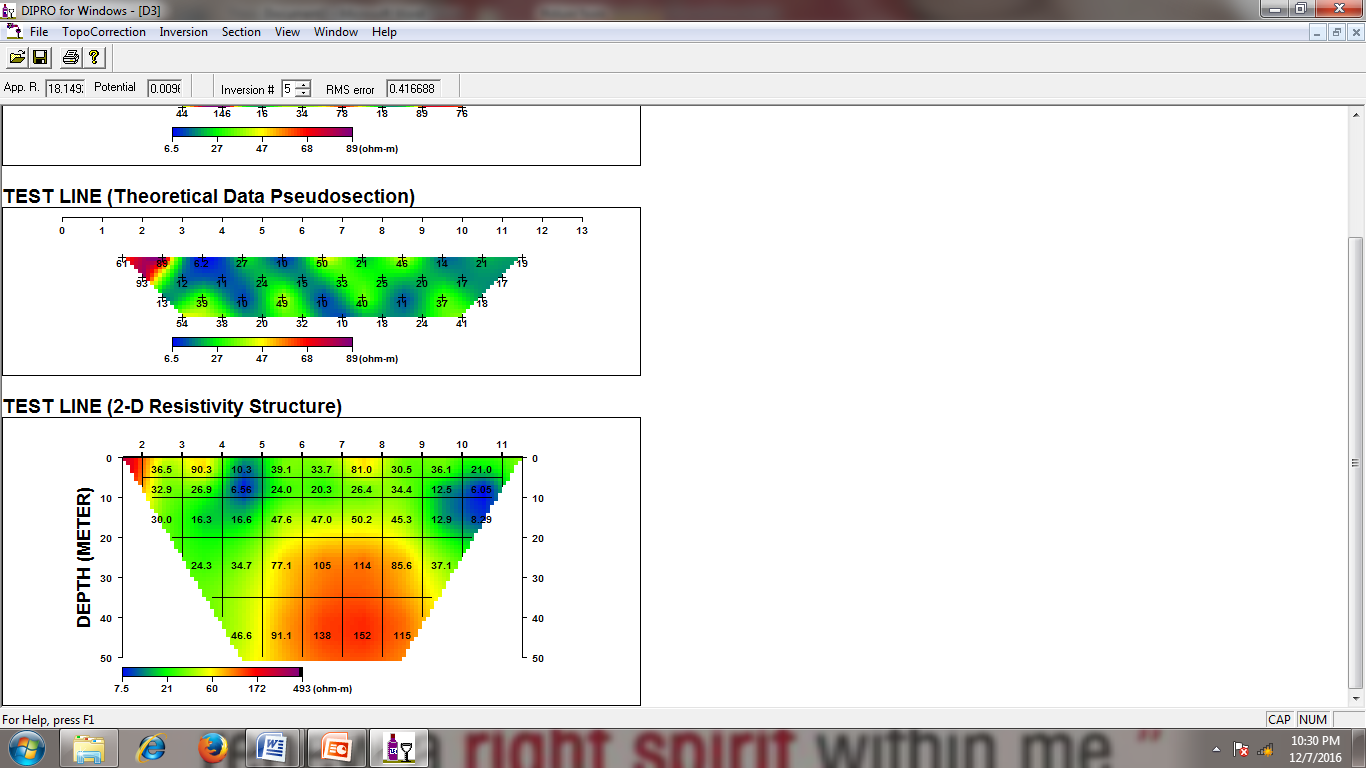


**Fig 21: Inverted 2D Resistivity Structure along Profile 8**

**
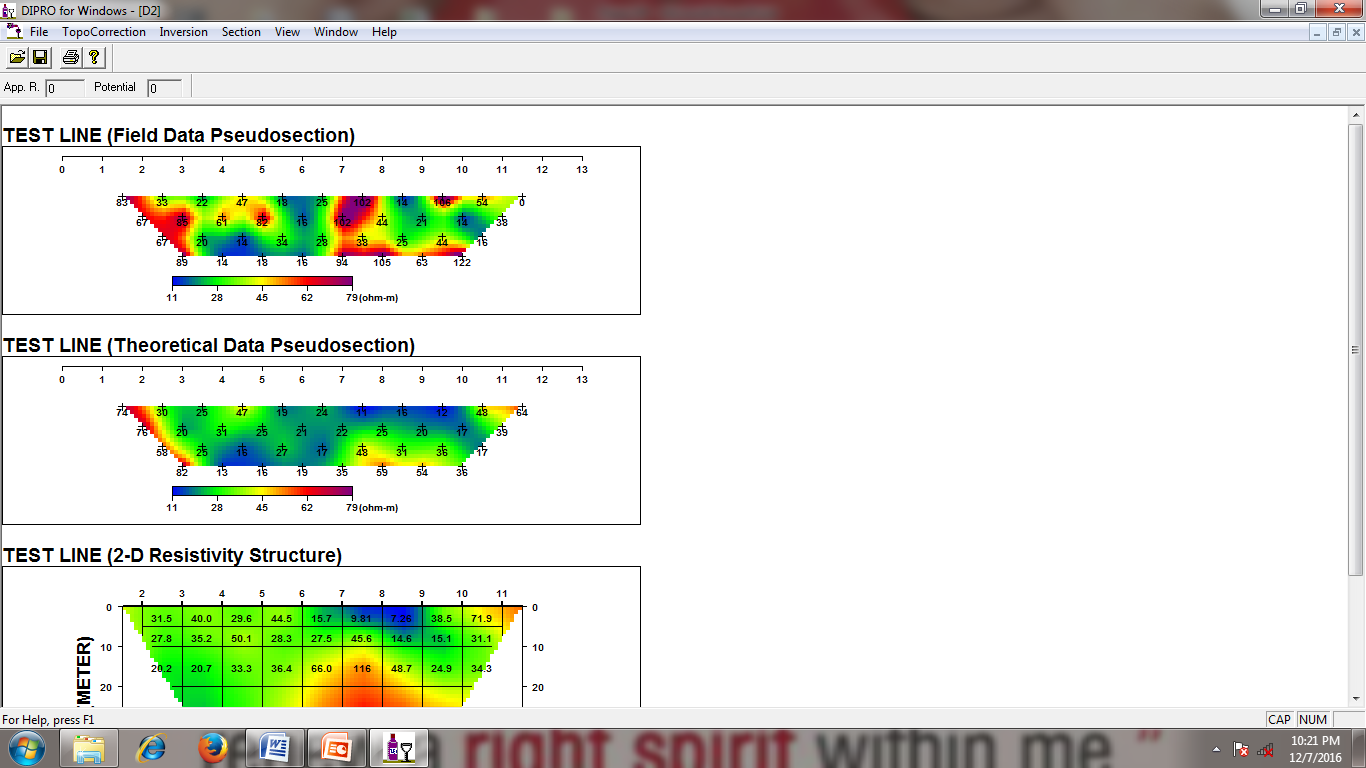
**


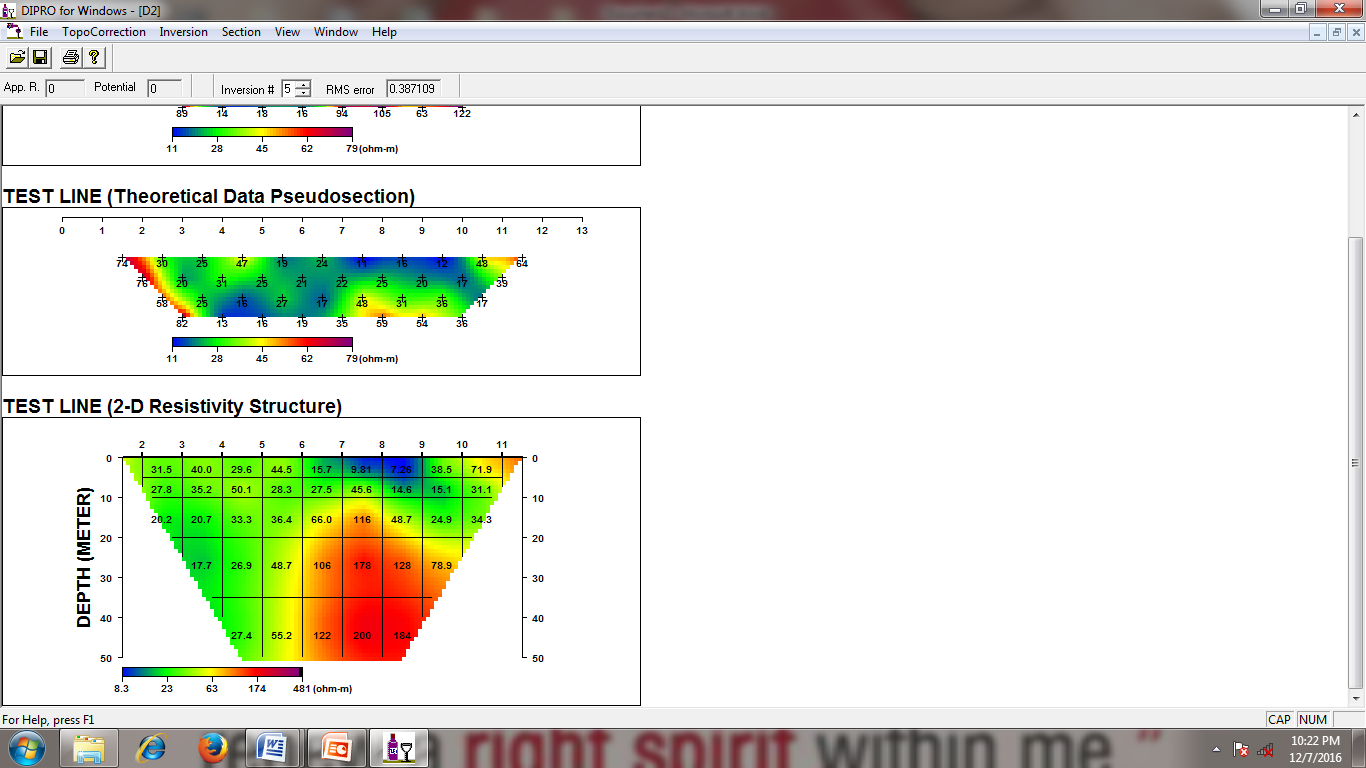


**Fig 22: Inverted 2D Resistivity Structure along Profile 9**
